# Supplementary figures and images for: BACE1 inhibition by microdose lithium formulation NP03 rescues memory loss and early stage amyloid neuropathology
Source: PubMed Central journal article supplement — Transl Psychiatry. 2017 Aug 1;7(8):e1190–. doi: 10.1038/tp.2017.169 (PMC5611736; doi:10.1038/tp.2017.169), 2017-08-01

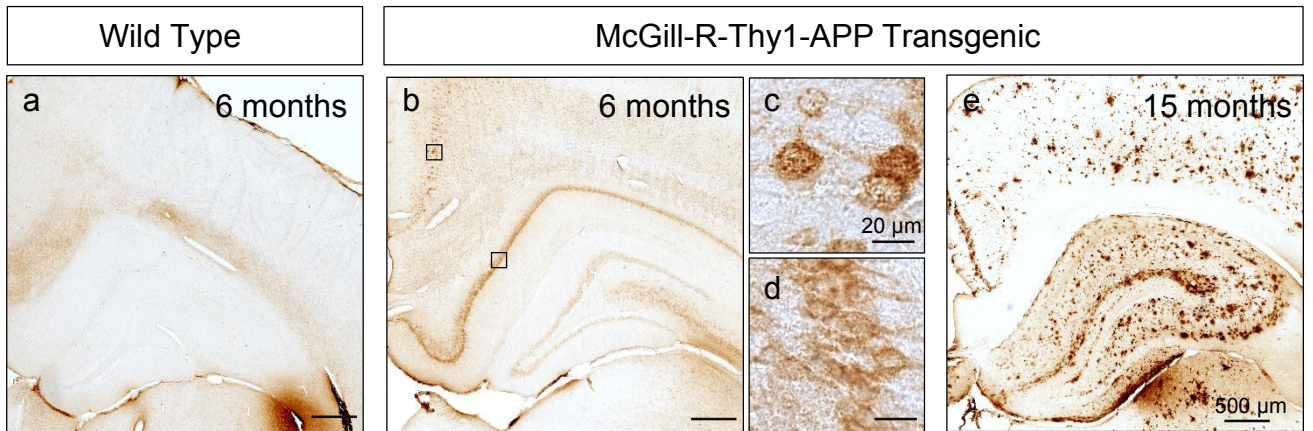

Supplement: tp2017169x2.pdf [file tp2017169x2.pdf]

Supplementary Figure 2

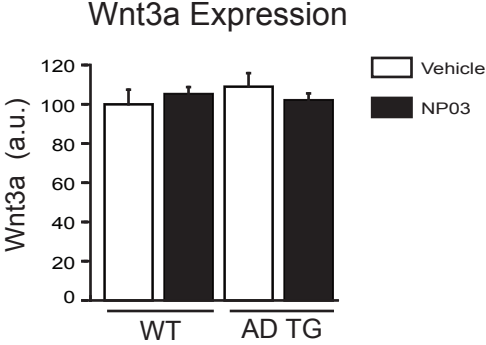

Supplement: tp2017169x3.pdf [file tp2017169x3.pdf]
